# Supplementary material for: A Metabolomic Signature of Obesity and Risk of Colorectal Cancer: Two Nested Case–Control Studies
Source: MDPI journal article supplement (doi:10.3390/metabo13020234), 2023-02-05
Supplement: s1 [file s1]

## **Supplementary Material**

### **A metabolomic signature of obesity and risk of colorectal cancer: two nested case-control studies**

Mingjia Yang, Chen Zhu, Lingbin Du, Jianv Huang, Jiayi Lu, Jing Yang, Ye Tong, Meng Zhu, Ci Song, Chong Shen, Juncheng Dai, Xiangfeng Lu, Zekuan Xu, Ni Li, Hongxia Ma, Zhibin Hu, Dongfeng Gu, Guangfu Jin, Dong Hang, Hongbing Shen

#### **Contents**

Supplementary figures

Supplementary tables

## Supplementary figures

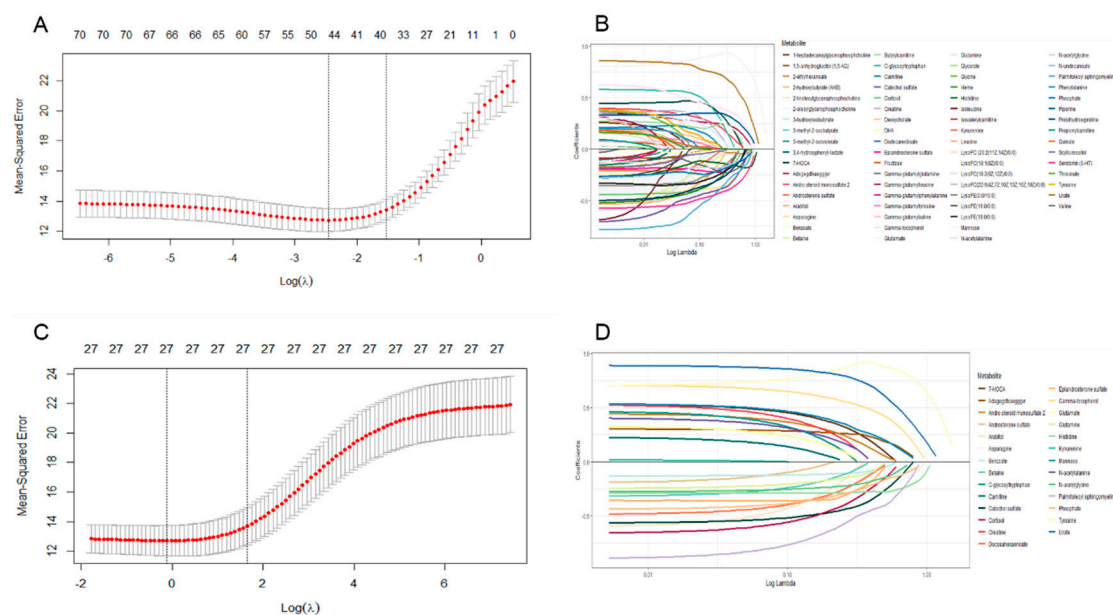

**Figure S1.** Selection of the optimal metabolites used to construct the metabolomic signature of body mass index by the LASSO (A and B) and Ridge regression models (C and D). The mean-squared error was plotted against  $\log(\lambda)$ , where  $\lambda$  was selected by ten-fold cross-validation. Abbreviations: LASSO, Least Absolute Shrinkage and Selection Operator.

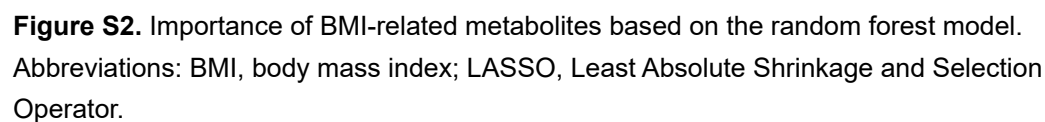

Abbreviations: BMI, body mass index; LASSO, Least Absolute Shrinkage and Selection Operator.

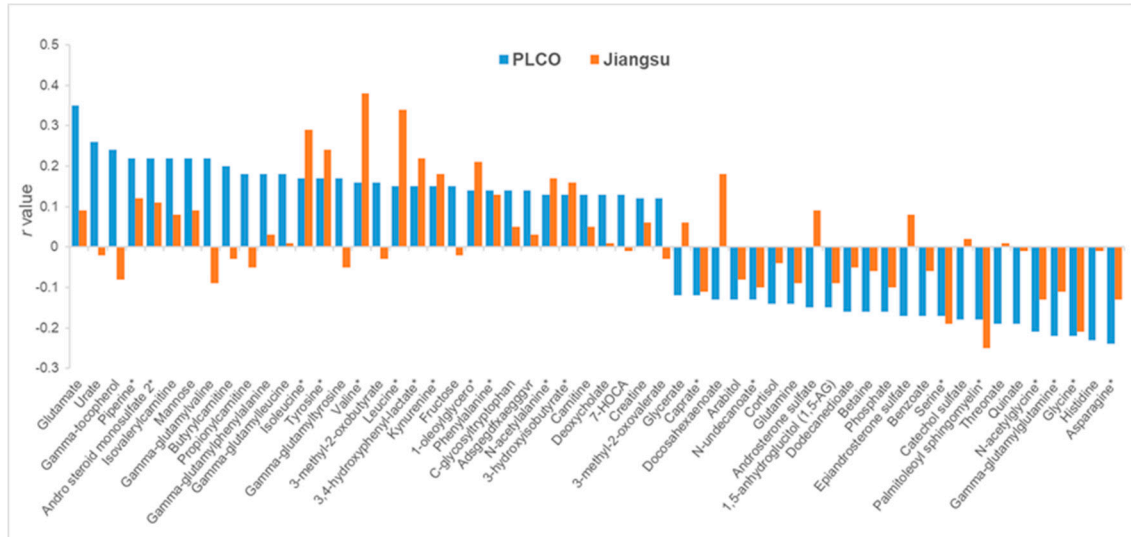

**Figure S3.** Validation of BMI-related metabolites identified from the PLCO cohort among participants from the Jiangsu cohort. A total of 20 metabolites (marked by asterisks) were validated to correlate with BMI in the Jiangsu cohort (nominal  $p < 0.05$ ). Abbreviations: PLCO, Prostate, Lung, Colorectal, and Ovarian Cancer Screening Trial.

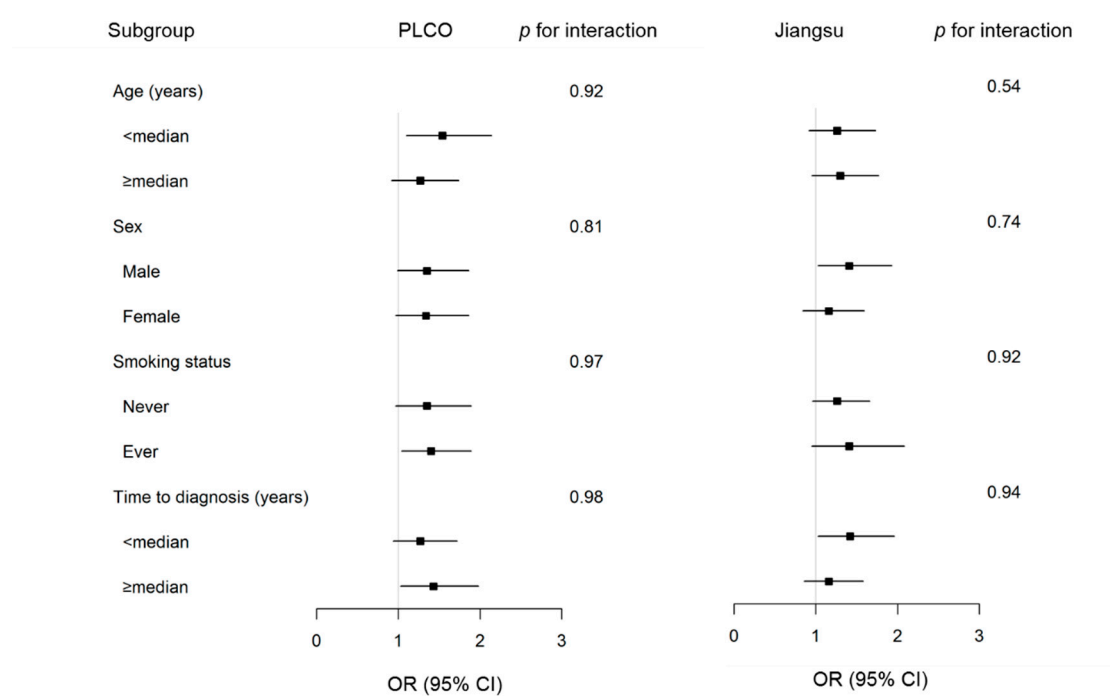

**Figure S4.** Stratified analysis of the association between the metabolomic signature and colorectal cancer risk by median age (PLCO: 64 years, Jiangsu: 60 years), sex (male, female), and median time to diagnosis (PLCO: 8.0 years, Jiangsu: 9.0 years). Abbreviations: PLCO, Prostate, Lung, Colorectal, and Ovarian Cancer Screening Trial

## Supplementary tables

**Table S1.** The 72 metabolites correlated with body mass index among 446 participants from the PLCO cohort<sup>a</sup>

| Metabolite                          | Sub pathway                               | HMDB        | <i>r</i> | <i>p</i> | <i>p</i> FDR | Reported study (PMID) |
|-------------------------------------|-------------------------------------------|-------------|----------|----------|--------------|-----------------------|
| Amino Acid                          |                                           |             |          |          |              |                       |
| Isovalerylcarnitine <sup>b</sup>    | Leucine, isoleucine and valine metabolism | HMDB0000688 | 0.22     | <0.001   | <0.001       | 30318341              |
| Isoleucine <sup>b</sup>             | Leucine, isoleucine and valine metabolism | HMDB0000172 | 0.17     | <0.001   | <0.01        | 30318341 and 35673462 |
| Valine                              | Leucine, isoleucine and valine metabolism | HMDB0000883 | 0.16     | <0.001   | <0.01        | 30318341 and 35673462 |
| 3-methyl-2-oxobutyrate <sup>b</sup> | Leucine, isoleucine and valine metabolism | HMDB0000019 | 0.16     | <0.001   | <0.01        | 30318341              |
| Leucine                             | Leucine, isoleucine and valine metabolism | HMDB0000687 | 0.15     | <0.01    | 0.01         | 30318341 and 35673462 |
| 3-hydroxyisobutyrate <sup>b</sup>   | Leucine, isoleucine and valine metabolism | HMDB0000023 | 0.13     | <0.01    | 0.03         | NA                    |
| 3-methyl-2-oxovalerate              | Leucine, isoleucine and valine metabolism | HMDB0000491 | 0.12     | 0.01     | 0.05         | 30318341              |
| Glycine <sup>b</sup>                | Glycine, serine and threonine metabolism  | HMDB0000123 | -0.22    | <0.001   | <0.001       | 30318341 and 35673462 |
| N-acetylglycine <sup>b</sup>        | Glycine, serine and threonine metabolism  | HMDB0000532 | -0.21    | <0.001   | <0.001       | 30318341              |
| Serine <sup>b</sup>                 | Glycine, serine and threonine metabolism  | HMDB0000187 | -0.17    | <0.001   | <0.01        | 30318341 and 35673462 |

|                                                      |                                          |             |       |        |        |                       |
|------------------------------------------------------|------------------------------------------|-------------|-------|--------|--------|-----------------------|
| Betaine <sup>b</sup>                                 | Glycine, serine and threonine metabolism | HMDB0000043 | -0.16 | <0.001 | <0.01  | 30318341 and 35673462 |
| Serotonin (5-HT) <sup>b</sup>                        | Tryptophan metabolism                    | HMDB00259   | -0.23 | <0.001 | <0.001 | 30318341 and 35673462 |
| Kynurenine <sup>b</sup>                              | Tryptophan metabolism                    | HMDB0000684 | 0.15  | <0.01  | <0.01  | 30318341 and 35673462 |
| C-glycosyltryptophan                                 | Tryptophan metabolism                    | HMDB0240296 | 0.14  | <0.01  | 0.02   | 30318341              |
| Glutamate <sup>b</sup>                               | Glutamate metabolism                     | HMDB0000148 | 0.35  | <0.001 | <0.001 | 30318341 and 35673462 |
| Glutamine <sup>b</sup>                               | Glutamate metabolism                     | HMDB0000641 | -0.14 | <0.01  | 0.02   | 30318341 and 35673462 |
| Asparagine <sup>b</sup>                              | Alanine and aspartate metabolism         | HMDB0000168 | -0.24 | <0.001 | <0.001 | 30318341 and 35673462 |
| N-acetylalanine                                      | Alanine and aspartate metabolism         | HMDB0000766 | 0.13  | <0.01  | 0.03   | 30318341              |
| Tyrosine <sup>b</sup>                                | Tyrosine metabolism                      | HMDB0000158 | 0.17  | <0.001 | <0.01  | 30318341 and 35673462 |
| 3,4-hydroxyphenyl-lactate                            | Tyrosine metabolism                      | HMDB0000755 | 0.15  | <0.01  | <0.01  | NA                    |
| Histidine <sup>b</sup>                               | Histidine metabolism                     | HMDB0000177 | -0.23 | <0.001 | <0.001 | 30318341 and 35673462 |
| Phenylalanine                                        | Phenylalanine metabolism                 | HMDB0000159 | 0.14  | <0.01  | 0.02   | 30318341 and 35673462 |
| Creatine <sup>b</sup>                                | Creatine metabolism                      | HMDB0000064 | 0.12  | 0.01   | 0.04   | 30318341 and 35673462 |
| Lipid                                                |                                          |             |       |        |        |                       |
| LysoPC(20:2(11Z,14Z)/0:0) <sup>b</sup>               | Glycerophospholipid metabolism           | HMDB10392   | -0.17 | <0.001 | <0.01  | NA                    |
| 2-oleoylglycerophosphocholine <sup>b</sup>           | Glycerophospholipid metabolism           | NA          | -0.16 | <0.001 | <0.01  | 26085512              |
| LysoPC(22:6(4Z,7Z,10Z,13Z,16Z,19Z)/0:0) <sup>b</sup> | Glycerophospholipid metabolism           | HMDB10404   | -0.16 | <0.001 | <0.01  | NA                    |
| LysoPC(18:2(9Z,12Z)/0:0) <sup>b</sup>                | Glycerophospholipid metabolism           | HMDB0010386 | -0.16 | <0.01  | <0.01  | NA                    |
| LysoPC(18:1(9Z)/0:0) <sup>b</sup>                    | Glycerophospholipid                      | HMDB02815   | -0.15 | <0.01  | <0.01  | NA                    |

|                                                  |                                              |             |       |        |        |                                    |
|--------------------------------------------------|----------------------------------------------|-------------|-------|--------|--------|------------------------------------|
|                                                  | metabolism                                   |             |       |        |        |                                    |
| LysoPE(16:0/0:0) <sup>b</sup>                    | Glycerophospholipid metabolism               | HMDB11503   | -0.15 | <0.01  | 0.01   | NA                                 |
| 2-linoleoylglycerophosphocholine <sup>b</sup>    | Glycerophospholipid metabolism               | NA          | -0.14 | <0.01  | 0.02   | NA                                 |
| LysoPE(0:0/16:0)                                 | Glycerophospholipid metabolism               | HMDB0011473 | -0.14 | <0.01  | 0.02   | NA                                 |
| 1-heptadecanoylglycerophosphcholine <sup>b</sup> | Glycerophospholipid metabolism               | NA          | -0.13 | <0.01  | 0.03   | NA                                 |
| LysoPE(18:0/0:0)                                 | Glycerophospholipid metabolism               | HMDB0011130 | -0.12 | 0.01   | 0.05   | NA                                 |
| Andro steroid monosulfate 2 <sup>b</sup>         | Androgenic steroids                          | NA          | 0.22  | <0.001 | <0.001 | 26085512                           |
| Epiandrosterone sulfate <sup>b</sup>             | Androgenic steroids                          | HMDB0062657 | -0.17 | <0.001 | <0.01  | 26085512                           |
| Androsterone sulfate                             | Androgenic steroids                          | HMDB0002759 | -0.15 | <0.01  | 0.01   | 26085512                           |
| 2-ethylhexanoate <sup>b</sup>                    | Medium chain fatty acid                      | HMDB0062546 | -0.20 | <0.001 | <0.001 | NA                                 |
| N-undecanoate                                    | Medium chain fatty acid                      | HMDB0000947 | -0.13 | <0.01  | 0.03   | NA                                 |
| Caprate                                          | Medium chain fatty acid                      | HMDB0000511 | -0.12 | <0.01  | 0.04   | 30318341 and 26085512              |
| Butyrylcarnitine <sup>b</sup>                    | Fatty acid metabolism (also BCAA metabolism) | HMDB0002013 | 0.20  | <0.001 | <0.001 | 30318341 and 26085512 and 29325144 |
| Propionylcarnitine <sup>b</sup>                  | Fatty acid metabolism (also BCAA metabolism) | HMDB0000824 | 0.18  | <0.001 | <0.01  | 30318341 and 26085512              |
| Deoxycholate                                     | Bile acids, alcohols and derivatives         | HMDB0246256 | 0.13  | <0.01  | 0.03   | 30318341                           |
| 7-HOCA <sup>b</sup>                              | Bile acids, alcohols and derivatives         | HMDB0012458 | 0.13  | <0.01  | 0.03   | 30318341 and 29325144              |
| 2-hydroxybutyrate (AHB) <sup>b</sup>             | Glutathione metabolism                       | HMDB0000008 | 0.18  | <0.001 | <0.01  | 30318341                           |

|                                           |                                                      |             |       |        |        |                       |
|-------------------------------------------|------------------------------------------------------|-------------|-------|--------|--------|-----------------------|
| Palmitoleoyl sphingomyelin <sup>b</sup>   | Sphingomyelins                                       | HMDB0010169 | -0.18 | <0.001 | <0.01  | 29325144              |
| Dodecanedioate <sup>b</sup>               | Fatty acid, dicarboxylate                            | HMDB0000623 | -0.16 | <0.001 | <0.01  | 30318341 and 26085512 |
| 1-oleoylglycerol <sup>b</sup>             | Monoacylglycerol                                     | HMDB0011567 | 0.14  | <0.01  | 0.02   | 30318341              |
| Cortisol                                  | Corticosteroids                                      | HMDB0000063 | -0.14 | <0.01  | 0.02   | 30318341 and 35673462 |
| Docosahexaenoate                          | Long chain polyunsaturated fatty acid (n3 and n6)    | HMDB0002183 | -0.13 | <0.01  | 0.03   | 30318341              |
| Carnitine                                 | Carnitine metabolism                                 | HMDB0000062 | 0.13  | <0.01  | 0.03   | 30318341 and 26085512 |
| Peptide                                   |                                                      |             |       |        |        |                       |
| Gamma-glutamylglutamine <sup>b</sup>      | Gamma-glutamyl amino acid                            | HMDB0011738 | -0.22 | <0.001 | <0.001 | 30318341 and 29325144 |
| Gamma-glutamylvaline <sup>b</sup>         | Gamma-glutamyl amino acid                            | HMDB0011172 | 0.22  | <0.001 | <0.001 | 30318341 and 29325144 |
| Gamma-glutamylphenylalanine <sup>b</sup>  | Gamma-glutamyl amino acid                            | HMDB0000594 | 0.18  | <0.001 | <0.01  | 30318341 and 29325144 |
| Gamma-glutamylleucine <sup>b</sup>        | Gamma-glutamyl amino acid                            | HMDB0011171 | 0.18  | <0.001 | <0.01  | 30318341              |
| Gamma-glutamyltyrosine <sup>b</sup>       | Gamma-glutamyl amino acid                            | HMDB0011741 | 0.17  | <0.001 | <0.01  | 30318341 and 29325144 |
| Prolylhydroxyproline <sup>b</sup>         | Urea cycle, arginine and proline metabolism          | HMDB0006695 | -0.20 | <0.001 | <0.001 | NA                    |
| Adsggdfxaegggr <sup>b</sup>               | Fibrinogen cleavage peptide                          | NA          | 0.14  | <0.01  | 0.02   | NA                    |
| Carbohydrate                              |                                                      |             |       |        |        |                       |
| Mannose <sup>b</sup>                      | Fructose, mannose and galactose metabolism           | HMDB0000169 | 0.22  | <0.001 | <0.001 | 30318341              |
| Fructose                                  | Fructose, mannose and galactose metabolism           | HMDB0000660 | 0.15  | <0.01  | <0.01  | 30318341              |
| 1,5-anhydroglucitol (1,5-AG) <sup>b</sup> | Glycolysis, gluconeogenesis, and pyruvate metabolism | HMDB0002712 | -0.15 | <0.01  | <0.01  | 30318341              |
| Glycerate                                 | Glycolysis, gluconeogenesis, and pyruvate metabolism | HMDB0000139 | -0.12 | 0.01   | 0.05   | 30318341              |
| Arabitol                                  | Pentose metabolism                                   | HMDB0001851 | -0.13 | <0.01  | 0.04   | 30318341              |

|                               |                                                            |             |       |        |        |                       |
|-------------------------------|------------------------------------------------------------|-------------|-------|--------|--------|-----------------------|
| Cofactors and vitamins        |                                                            |             |       |        |        |                       |
| Gamma-tocopherol <sup>b</sup> | Tocopherol metabolism                                      | HMDB0006335 | 0.24  | <0.001 | <0.001 | 30318341 and 29325144 |
| Threonate <sup>b</sup>        | Ascorbate and aldarate metabolism                          | HMDB0062620 | -0.19 | <0.001 | <0.001 | 30318341 and 29325144 |
| Scyllo-inositol <sup>b</sup>  | Cyclohexanols                                              | HMDB0000160 | -0.16 | <0.001 | <0.01  | 29325144              |
| Heme <sup>b</sup>             | Porphyrin metabolism                                       | HMDB03178   | -0.14 | <0.01  | 0.01   | NA                    |
| Xenobiotics                   |                                                            |             |       |        |        |                       |
| Piperine <sup>b</sup>         | Food component/Plant                                       | HMDB0029377 | 0.22  | <0.001 | <0.001 | 30318341              |
| Quinate <sup>b</sup>          | Food component/Plant                                       | HMDB0003072 | -0.19 | <0.001 | <0.01  | NA                    |
| Catechol sulfate <sup>b</sup> | Benzoate metabolism                                        | HMDB0059724 | -0.18 | <0.001 | <0.01  | NA                    |
| Benzoate <sup>b</sup>         | Benzoate metabolism                                        | HMDB0001870 | -0.17 | <0.001 | <0.01  | 23862058              |
| Nucleotide                    |                                                            |             |       |        |        |                       |
| Urate <sup>b</sup>            | Purine metabolism,<br>(Hypo)Xanthine/Inosine<br>containing | HMDB0000289 | 0.26  | <0.001 | <0.001 | 30318341 and 29325144 |
| Energy                        |                                                            |             |       |        |        |                       |
| Phosphate <sup>b</sup>        | Oxidative phosphorylation                                  | HMDB0001429 | -0.16 | <0.001 | <0.01  | 21528821              |

<sup>a</sup> Spearman correlation coefficients were adjusted for age, sex, smoking status (never, former, current), and pack-years of smoking.

<sup>b</sup> The 53 metabolites that were also correlated with weight change from 20 years old to baseline ( $p$  FDR <0.05).

Abbreviations: PLCO, Prostate, Lung, Colorectal, and Ovarian Cancer Screening Trial; NA, not available; FDR, false discovery rate.

**Table S2.** The coefficients from the LASSO and Ridge regression models

| Metabolite                  | HMDB        | LASSO regression coefficient | Ridge regression coefficient |
|-----------------------------|-------------|------------------------------|------------------------------|
| Amino Acid                  |             |                              |                              |
| Glutamate                   | HMDB0000148 | 0.920415609                  | 0.516161                     |
| Asparagine                  | HMDB0000168 | -0.373030474                 | -0.2798661                   |
| Histidine                   | HMDB0000177 | -0.13460453                  | -0.2868985                   |
| Serotonin (5-HT)            | HMDB00259   | -0.433762706                 | NA                           |
| N-acetylglycine             | HMDB0000532 | -0.18138198                  | -0.2462403                   |
| Tyrosine                    | HMDB0000158 | 0.038744849                  | 0.2032281                    |
| Betaine                     | HMDB0000043 | -0.081337773                 | -0.1919704                   |
| Kynurenine                  | HMDB0000684 | 0.004934039                  | 0.1686917                    |
| Glutamine                   | HMDB0000641 | -0.000539873                 | -0.2003349                   |
| C-glycosyltryptophan        | HMDB0240296 | 0.321668972                  | 0.2098366                    |
| N-acetylalanine             | HMDB0000766 | 0.13081444                   | 0.2144665                    |
| Creatine                    | HMDB0000064 | 0.161833366                  | 0.2028269                    |
| Lipid                       |             |                              |                              |
| Andro steroid monosulfate 2 | NA          | 0.227524563                  | 0.3000439                    |
| 2-ethylhexanoate            | HMDB0062546 | -0.019977624                 | NA                           |
| Butyrylcarnitine            | HMDB0002013 | 0.239947416                  | NA                           |
| Palmitoleoyl sphingomyelin  | HMDB0010169 | -0.409900745                 | -0.3659114                   |
| Epiandrosterone sulfate     | HMDB0062657 | -0.22664085                  | -0.1739007                   |
| LysoPE(16:0/0:0)            | HMDB11503   | -0.201251935                 | NA                           |
| Androsterone sulfate        | HMDB0002759 | -0.033272227                 | -0.1622673                   |
| Cortisol                    | HMDB0000063 | -0.289800913                 | -0.3022905                   |
| LysoPE(0:0/16:0)            | HMDB0011473 | -0.252697188                 | NA                           |
| Docosahexaenoate            | HMDB0002183 | -0.206768782                 | -0.238051                    |
| Carnitine                   | HMDB0000062 | 0.047234472                  | 0.1608771                    |
| Deoxycholate                | HMDB0246256 | 0.007759794                  | NA                           |
| 7-HOCA                      | HMDB0012458 | 0.359546627                  | 0.2869461                    |
| LysoPE(18:0/0:0)            | HMDB0011130 | -0.374069059                 | NA                           |
| Peptide                     |             |                              |                              |
| Gamma-glutamylglutamine     | HMDB0011738 | -0.215507148                 | NA                           |
| Prolylhydroxyproline        | HMDB0006695 | -0.300133784                 | NA                           |
| Adsggdgfaegggr              | NA          | 0.24791978                   | 0.2345603                    |
| Carbohydrate                |             |                              |                              |
| Mannose                     | HMDB0000169 | 0.283501057                  | 0.3015167                    |
| Arabitol                    | HMDB0001851 | -0.147683256                 | -0.2537887                   |
| Cofactors and vitamins      |             |                              |                              |
| Gamma_tocopherol            | HMDB0006335 | 0.408906207                  | 0.3854707                    |
| Scyllo-inositol             | HMDB0000160 | -0.020473208                 | NA                           |
| Heme                        | HMDB03178   | -0.29154954                  | NA                           |
| Xenobiotics                 |             |                              |                              |
| Piperine                    | HMDB0029377 | 0.351999278                  | NA                           |
| Catechol sulfate            | HMDB0059724 | -0.396812463                 | -0.3364843                   |

|            |             |              |            |
|------------|-------------|--------------|------------|
| Benzoate   | HMDB0001870 | -0.010408274 | -0.1944526 |
| Nucleotide |             |              |            |
| Urate      | HMDB0000289 | 0.734723773  | 0.4359744  |
| Energy     |             |              |            |
| Phosphate  | HMDB0001429 | -0.214415097 | -0.3367624 |

---

Abbreviations: LASSO, Least Absolute Shrinkage and Selection Operator; PLCO, Prostate, Lung, Colorectal, and Ovarian Cancer Screening Trial; NA, not available.

**Table S3.** The 59 metabolites correlated with weight change from 20 years old to baseline among 446 participants from the PLCO cohort<sup>a</sup>

| Metabolite                              | Sub pathway                                  | HMDB        | <i>r</i> | <i>p</i> | <i>p</i> FDR |
|-----------------------------------------|----------------------------------------------|-------------|----------|----------|--------------|
| Amino acid                              |                                              |             |          |          |              |
| Betaine                                 | Glycine, serine and threonine metabolism     | HMDB0000043 | -0.23    | <0.001   | <0.001       |
| Glycine                                 | Glycine, serine and threonine metabolism     | HMDB0000123 | -0.22    | <0.001   | <0.001       |
| N-acetylglycine                         | Glycine, serine and threonine metabolism     | HMDB0000532 | -0.20    | <0.001   | <0.001       |
| Serine                                  | Glycine, serine and threonine metabolism     | HMDB0000187 | -0.16    | <0.01    | <0.01        |
| Isoleucine                              | Leucine, isoleucine and valine metabolism    | HMDB0000172 | 0.15     | <0.01    | 0.01         |
| 3-hydroxyisobutyrate                    | Leucine, isoleucine and valine metabolism    | HMDB0000023 | 0.13     | <0.01    | 0.03         |
| 3-methyl-2-oxobutyrate                  | Leucine, isoleucine and valine metabolism    | HMDB0000019 | 0.15     | <0.01    | <0.01        |
| Isovalerylcarnitine                     | Leucine, isoleucine and valine metabolism    | HMDB0000688 | 0.19     | <0.001   | <0.01        |
| Glutamate                               | Glutamate metabolism                         | HMDB0000148 | 0.33     | <0.001   | <0.001       |
| Glutamine                               | Glutamate metabolism                         | HMDB0000641 | -0.14    | <0.01    | 0.03         |
| Kynurenine                              | Tryptophan metabolism                        | HMDB0000684 | 0.13     | <0.01    | 0.04         |
| Serotonin (5-HT)                        | Tryptophan metabolism                        | HMDB00259   | -0.20    | <0.001   | <0.001       |
| Asparagine                              | Alanine and aspartate metabolism             | HMDB0000168 | -0.24    | <0.001   | <0.001       |
| Tyrosine                                | Tyrosine metabolism                          | HMDB0000158 | 0.13     | <0.01    | 0.03         |
| Creatine                                | Creatine metabolism                          | HMDB0000064 | 0.15     | <0.01    | 0.01         |
| Histidine                               | Histidine metabolism                         | HMDB0000177 | -0.20    | <0.001   | <0.001       |
| Lipid                                   |                                              |             |          |          |              |
| LysoPC(18:2(9Z,12Z)/0:0)                | Glycerophospholipid                          | HMDB0010386 | -0.20    | <0.001   | <0.001       |
| 2-oleoylglycerophosphocholine           | Glycerophospholipid                          | NA          | -0.18    | <0.001   | <0.01        |
| LysoPC(22:6(4Z,7Z,10Z,13Z,16Z,19Z)/0:0) | Glycerophospholipid                          | HMDB10404   | -0.18    | <0.001   | <0.01        |
| LysoPC(20:2(11Z,14Z)/0:0)               | Glycerophospholipid                          | HMDB10392   | -0.18    | <0.001   | <0.01        |
| 2-linoleoylglycerophosphocholine        | Glycerophospholipid                          | NA          | -0.16    | <0.001   | <0.01        |
| 1-heptadecanoylglycerophosphocholine    | Glycerophospholipid                          | NA          | -0.16    | <0.001   | <0.01        |
| LysoPE(16:0/0:0)                        | Glycerophospholipid                          | HMDB11503   | -0.16    | <0.01    | <0.01        |
| LysoPC(18:1(9Z)/0:0)                    | Glycerophospholipid                          | HMDB02815   | -0.17    | <0.01    | <0.01        |
| Propionylcarnitine                      | Fatty acid metabolism (also BCAA metabolism) | HMDB0000824 | 0.18     | <0.001   | <0.01        |
| Butyrylcarnitine                        | Fatty acid metabolism (also BCAA metabolism) | HMDB0002013 | 0.19     | <0.001   | <0.001       |
| 2-methylbutyrylcarnitine                | Fatty acid metabolism                        | HMDB0000378 | 0.12     | <0.01    | 0.04         |
| 2-ethylhexanoate                        | Medium chain fatty acid                      | HMDB0062546 | -0.17    | <0.01    | <0.01        |

|                                           |                                                      |             |       |        |        |
|-------------------------------------------|------------------------------------------------------|-------------|-------|--------|--------|
| Nonadecanoate (19:0)                      | Long chain saturated fatty acid                      | HMDB0000772 | -0.13 | <0.01  | 0.03   |
| Dodecanedioate                            | Fatty acid, dicarboxylate                            | HMDB0000623 | -0.15 | <0.01  | <0.01  |
| Epiandrosterone sulfate                   | Androgenic steroids                                  | HMDB0062657 | -0.15 | <0.01  | 0.01   |
| Andro steroid monosulfate 2               | Androgenic steroids                                  | NA          | 0.24  | <0.001 | <0.001 |
| 4-androsten-3beta,17beta-diol disulfate 1 | Androgenic steroids                                  | NA          | 0.13  | <0.01  | 0.04   |
| 4-androsten-3beta,17beta-diol disulfate 2 | Androgenic steroids                                  | NA          | 0.13  | <0.01  | 0.04   |
| 1-oleoylglycerol                          | Monoacylglycerol                                     | HMDB0011567 | 0.16  | <0.01  | <0.01  |
| 2-hydroxybutyrate (AHB)                   | Glutathione metabolism                               | HMDB0000008 | 0.19  | <0.001 | <0.001 |
| 7-HOCA                                    | Bile acids, alcohols and derivativesl                | HMDB0012458 | 0.13  | <0.01  | 0.03   |
| Palmitoyl sphingomyelin                   | Sphingomyelins                                       | HMDB0010169 | -0.19 | <0.001 | <0.01  |
| Peptide                                   |                                                      |             |       |        |        |
| Gamma-glutamylglutamine                   | Gamma-glutamyl amino acid                            | HMDB0011738 | -0.22 | <0.001 | <0.001 |
| Gamma-glutamylvaline                      | Gamma-glutamyl amino acid                            | HMDB0011172 | 0.21  | <0.001 | <0.001 |
| Gamma-glutamyltyrosine                    | Gamma-glutamyl amino acid                            | HMDB0011741 | 0.15  | <0.01  | <0.01  |
| Gamma-glutamylleucine                     | Gamma-glutamyl amino acid                            | HMDB0011171 | 0.15  | <0.01  | <0.01  |
| Gamma-glutamylphenylalanine               | Gamma-glutamyl amino acid                            | HMDB0000594 | 0.15  | <0.01  | <0.01  |
| Prolylhydroxyproline                      | Urea cycle; arginine and proline metabolism          | HMDB0006695 | -0.20 | <0.001 | <0.001 |
| Adsggdfxaegggr                            | Fibrinogen cleavage peptide                          | NA          | 0.12  | <0.01  | 0.04   |
| Carbohydrate                              |                                                      |             |       |        |        |
| Mannose                                   | Fructose, mannose and galactose metabolism           | HMDB0000169 | 0.21  | <0.001 | <0.001 |
| 1,5-anhydroglucitol (1,5-AG)              | Glycolysis, gluconeogenesis, and pyruvate metabolism | HMDB0002712 | -0.14 | <0.01  | 0.02   |
| Cofactors and vitamins                    |                                                      |             |       |        |        |
| Gamma-tocopherol                          | Tocopherol metabolism                                | HMDB0006335 | 0.24  | <0.001 | <0.001 |
| Scyllo-inositol                           | Cyclohexanols                                        | HMDB0000160 | -0.16 | <0.01  | <0.01  |
| Threonate                                 | Ascorbate and aldarate metabolism                    | HMDB0062620 | -0.19 | <0.001 | <0.01  |
| Heme                                      | Porphyrin metabolism                                 | HMDB03178   | -0.15 | <0.01  | 0.01   |
| Xenobiotics                               |                                                      |             |       |        |        |
| Catechol sulfate                          | Benzoate metabolism                                  | HMDB0059724 | -0.18 | <0.001 | <0.01  |
| Benzoate                                  | Benzoate metabolism                                  | HMDB0001870 | -0.15 | <0.01  | 0.01   |
| Hippurate                                 | Benzoate metabolism                                  | HMDB0062583 | -0.17 | <0.001 | <0.01  |
| Piperine                                  | Food component/Plant                                 | HMDB0029377 | 0.22  | <0.001 | <0.001 |
| Quinate                                   | Food component/Plant                                 | HMDB0003072 | -0.17 | <0.001 | <0.01  |

|               |                                                            |             |       |        |        |  |
|---------------|------------------------------------------------------------|-------------|-------|--------|--------|--|
| Nucleotide    |                                                            |             |       |        |        |  |
| Urate         | Purine metabolism,<br>(hypo)xanthine/Inosine<br>containing | HMDB0000289 | 0.24  | <0.001 | <0.001 |  |
| Pseudouridine | Pyrimidine metabolism,<br>uracil containing                | HMDB0000767 | 0.13  | <0.01  | 0.04   |  |
| Energy        |                                                            |             |       |        |        |  |
| Phosphate     | Oxidative phosphorylation                                  | HMDB0001429 | -0.16 | <0.001 | <0.01  |  |

<sup>a</sup> Spearman correlation coefficients were adjusted for age, sex, smoking status (never, former, current), and pack-years of smoking.

Abbreviations: PLCO, Prostate, Lung, Colorectal, and Ovarian Cancer Screening Trial; NA, not available; FDR, false discovery rate.

**Table S4.** Associations between BMI-related metabolites and colorectal cancer risk in the PLCO and Jiangsu cohorts

| Cohort  | Metabolites                 | Quartiles of metabolites, OR (95% CI) <sup>a</sup> |                     |                     |                     | <i>p</i> for trend | OR per 1-SD increase |
|---------|-----------------------------|----------------------------------------------------|---------------------|---------------------|---------------------|--------------------|----------------------|
|         |                             | Q1                                                 | Q2                  | Q3                  | Q4                  |                    |                      |
| PLCO    | Glutamine                   | 1<br>(referent)                                    | 0.80<br>(0.45-1.42) | 0.74<br>(0.41-1.36) | 0.58<br>(0.30-1.10) | 0.01               | 0.72<br>(0.57-0.92)  |
|         |                             | 1<br>(referent)                                    | 0.73<br>(0.40-1.34) | 0.84<br>(0.46-1.54) | 0.41<br>(0.21-0.80) | 0.01               | 0.73<br>(0.57-0.92)  |
|         | Gamma-glutamylglutamine     | 1<br>(referent)                                    | 0.82<br>(0.46-1.47) | 0.82<br>(0.44-1.54) | 0.49<br>(0.25-0.96) | 0.01               | 0.72<br>(0.56-0.93)  |
|         |                             | 1<br>(referent)                                    | 1.39<br>(0.73-2.67) | 1.48<br>(0.75-2.91) | 1.79<br>(0.91-3.53) | 0.04               | 1.27<br>(1.01-1.61)  |
| Jiangsu | Glutamine                   | 1<br>(referent)                                    | 0.56<br>(0.26-1.20) | 0.87<br>(0.26-2.90) | 0.49<br>(0.13-1.78) | 0.02               | 0.50<br>(0.28-0.90)  |
|         |                             | 1<br>(referent)                                    | 0.61<br>(0.32-1.19) | 0.62<br>(0.27-1.42) | 0.68<br>(0.29-1.58) | 0.57               | 0.92<br>(0.69-1.23)  |
|         | Andro steroid monosulfate 2 | 1<br>(referent)                                    | 1.10<br>(0.60-2.03) | 1.45<br>(0.73-2.89) | 1.31<br>(0.61-2.84) | 0.24               | 1.18<br>(0.89-1.56)  |
|         |                             |                                                    |                     |                     |                     |                    |                      |

<sup>a</sup> Conditional logistic regression model adjusted for age, smoking status, pack-years of smoking, alcohol intake, diabetes history, and in the PLCO, study center and family history of colorectal cancer.

Abbreviations: PLCO, Prostate, Lung, Colorectal, and Ovarian Cancer Screening Trial; OR, odds ratio; CI, confidence interval; SD, standard deviation.
